# Supplementary material for: COVID-19 Lockdowns—Effect on Concentration of Pharmaceuticals and Illicit Drugs in Two Major Croatian Rivers
Source: MDPI journal article supplement (doi:10.3390/toxics10050241), 2022-05-10
Supplement: s1 [file s1]

# COVID-19 Lockdowns—Effect on Concentration of Pharmaceuticals and Illicit Drugs in Two Major Croatian Rivers

Draženka Stipaničev, Siniša Repec, Matej Vucić, Mario Lovrić and Göran Klobučar

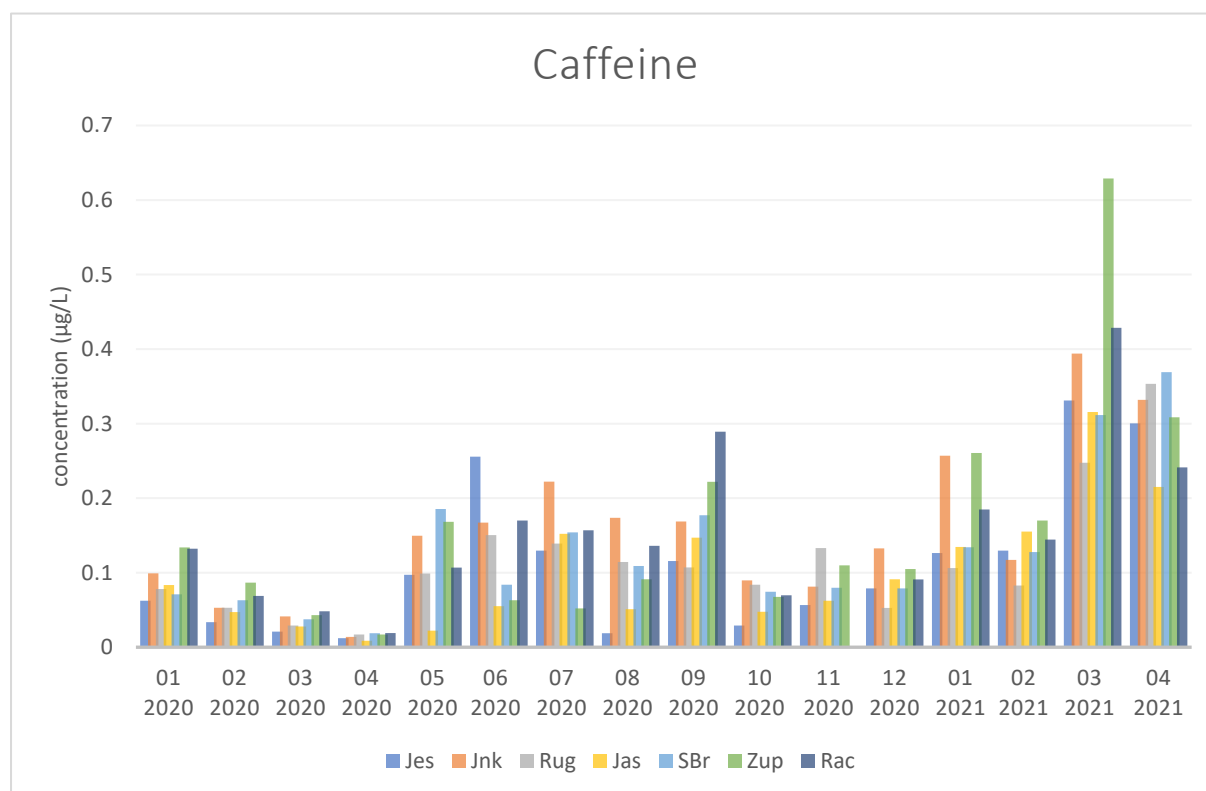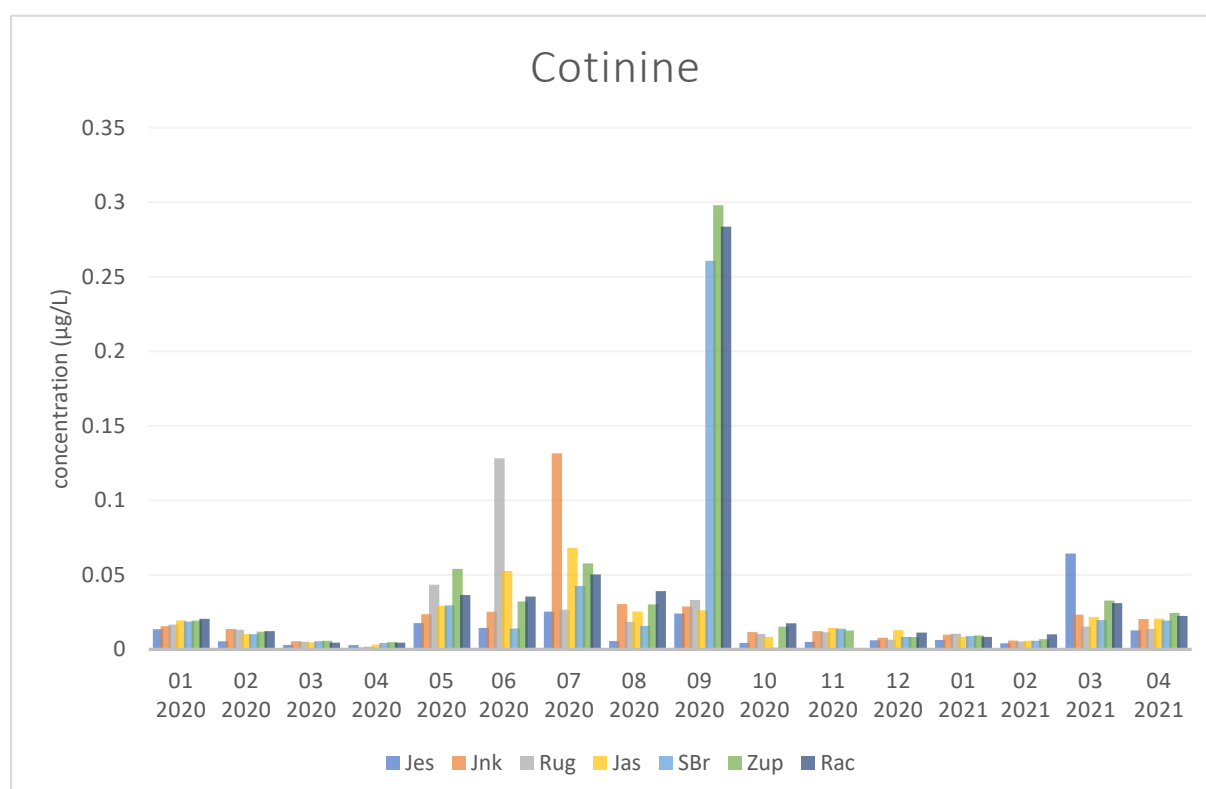

## Carbamazepine

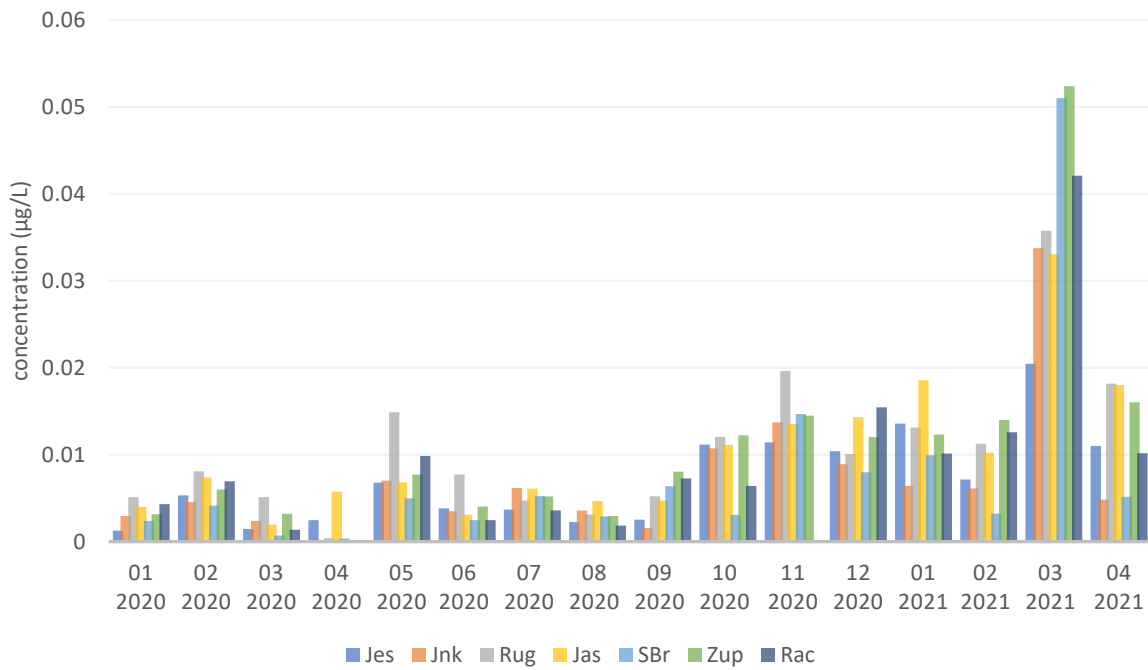

## 10-Hydroxycarbamazepine

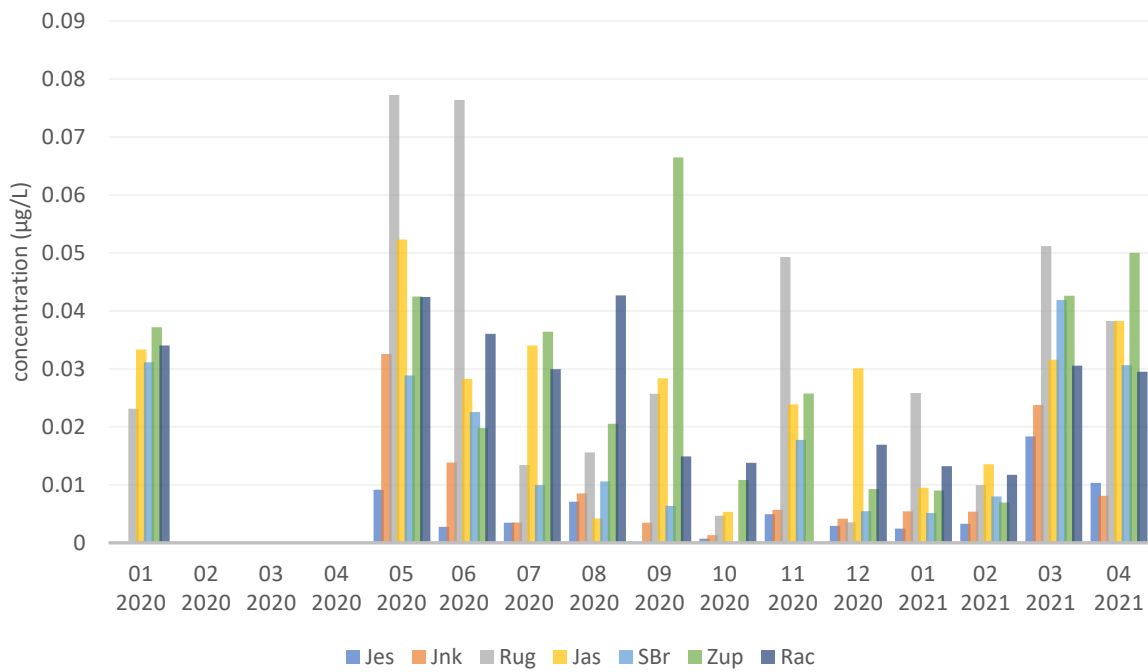

## Lamotrigine

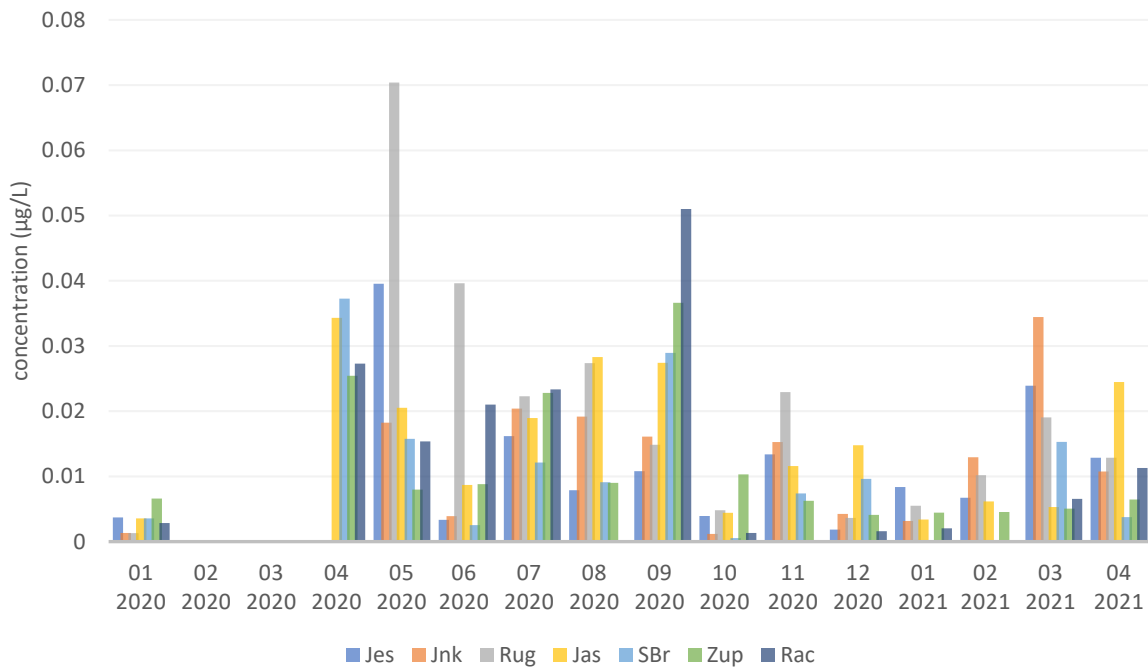

## Venlafaxine

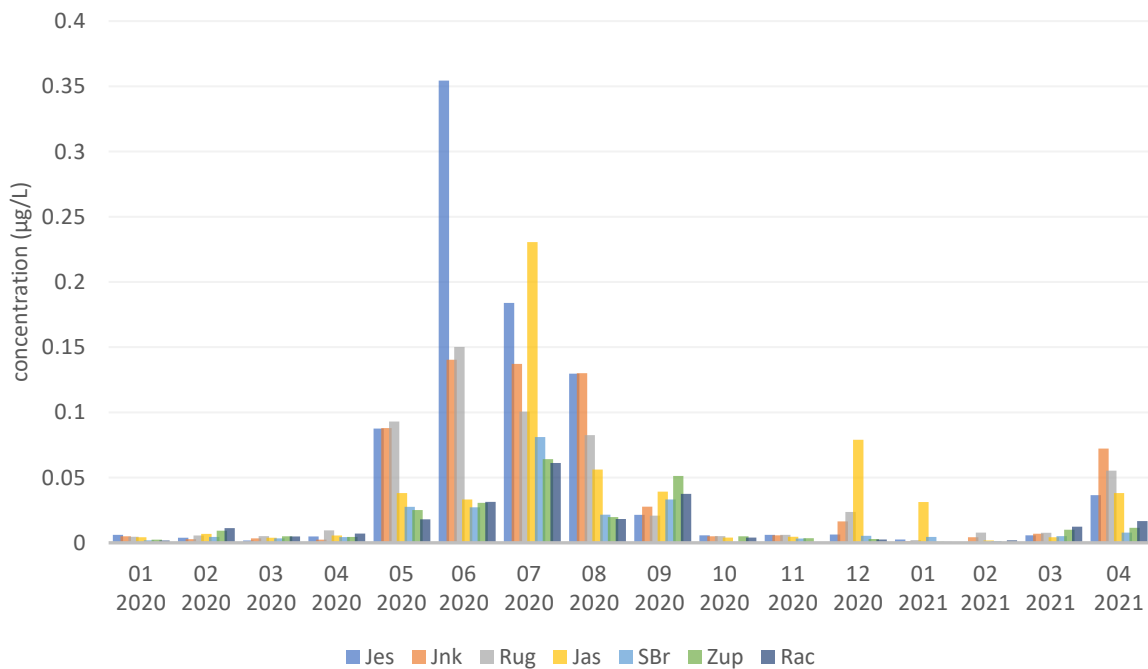

## O-Desmethylenlafaxine

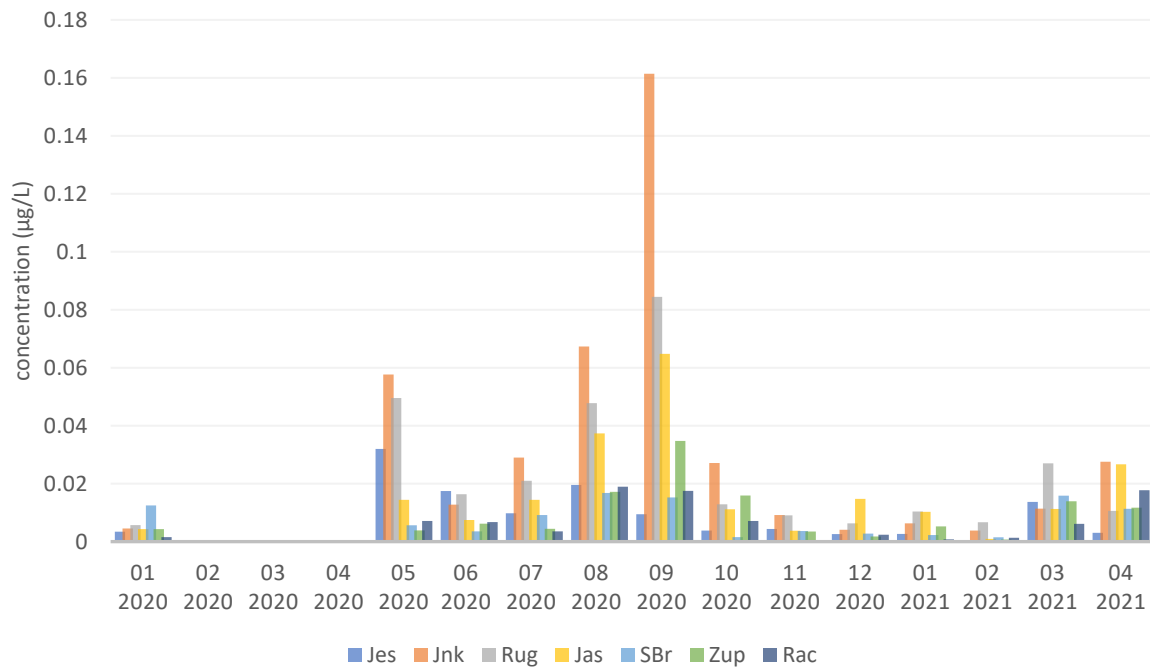

## Torasemide

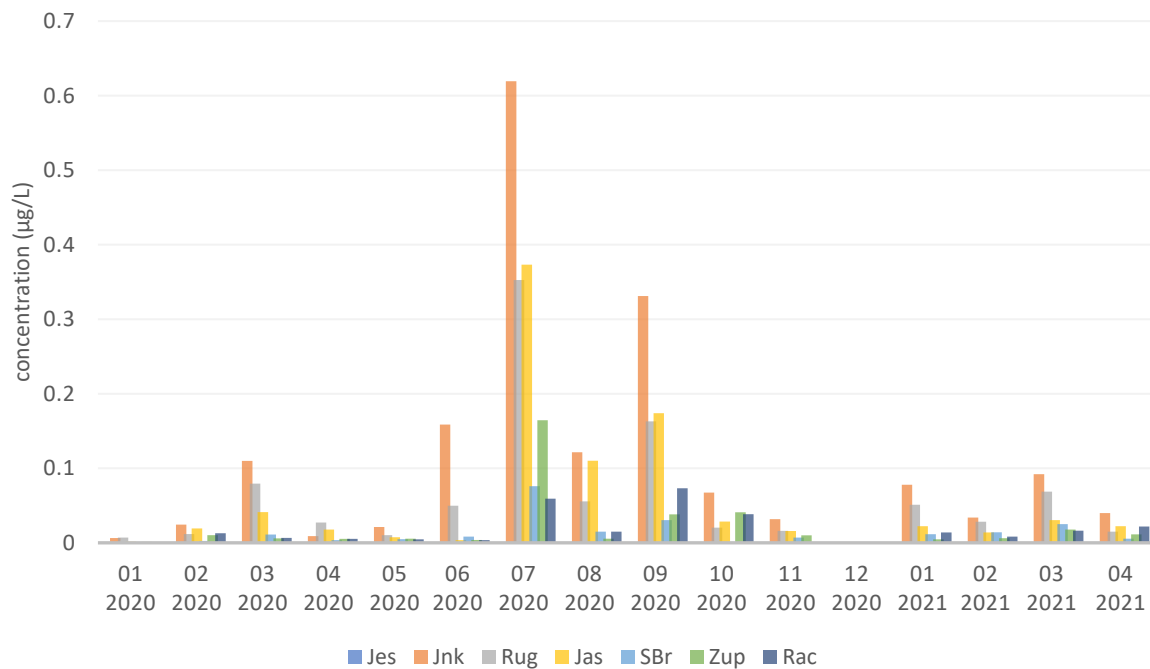

## Bisoprolol

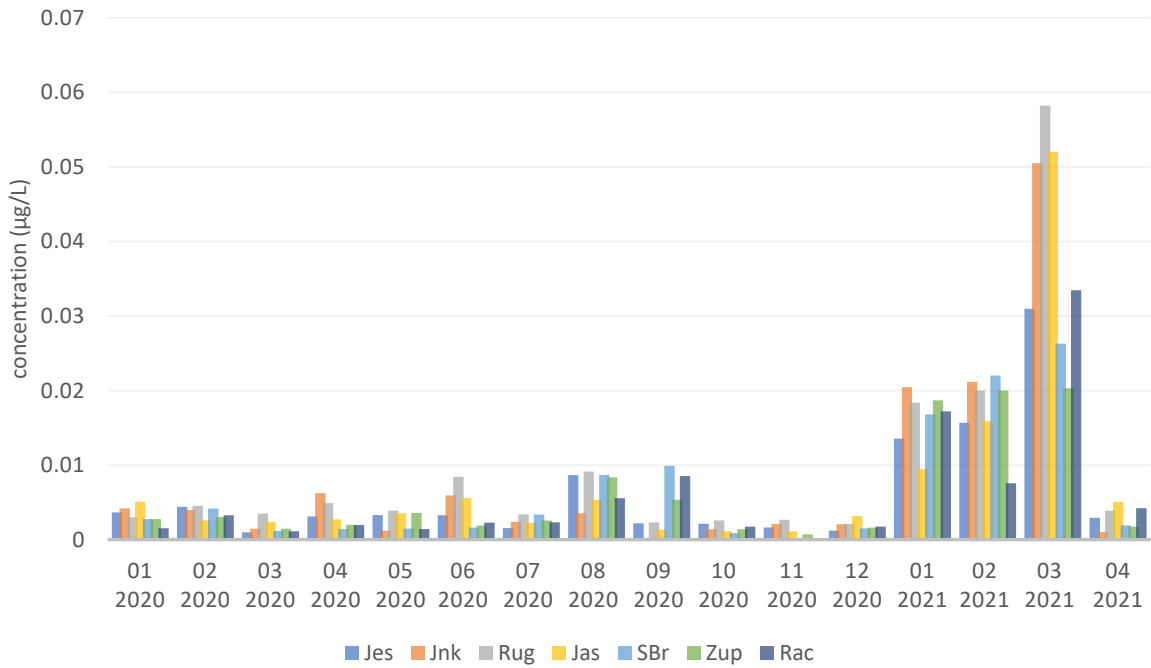

## Metoprolol

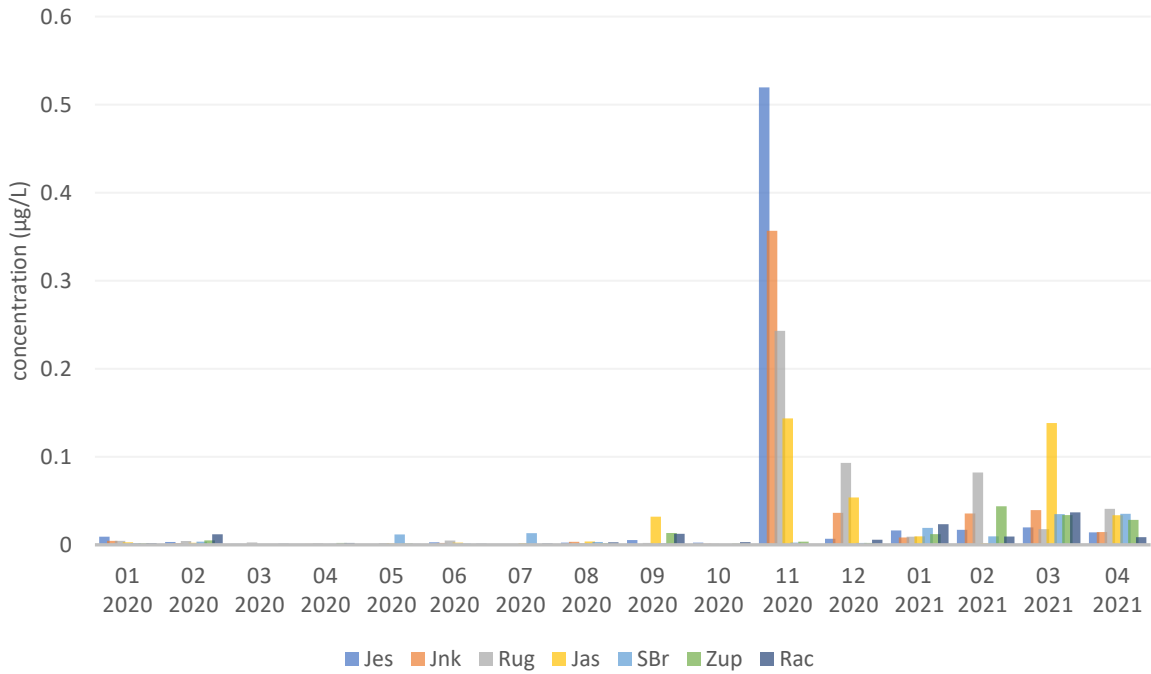

### 4-Acetylaminoantipyrine

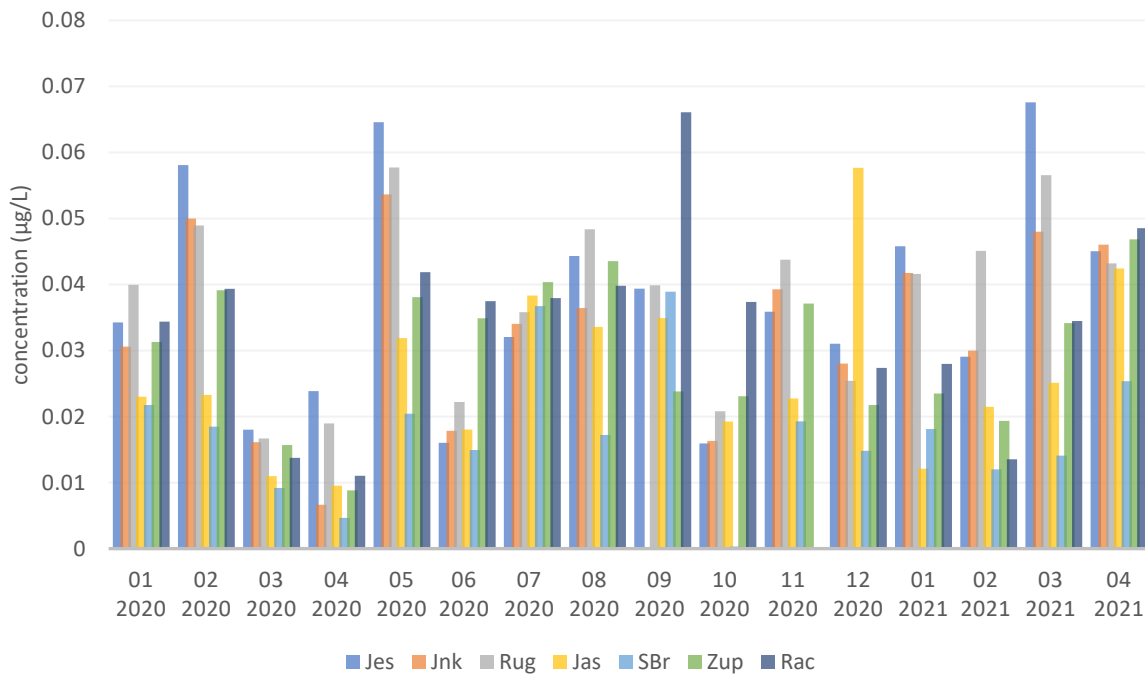

### 4-Formylaminoantipyrine

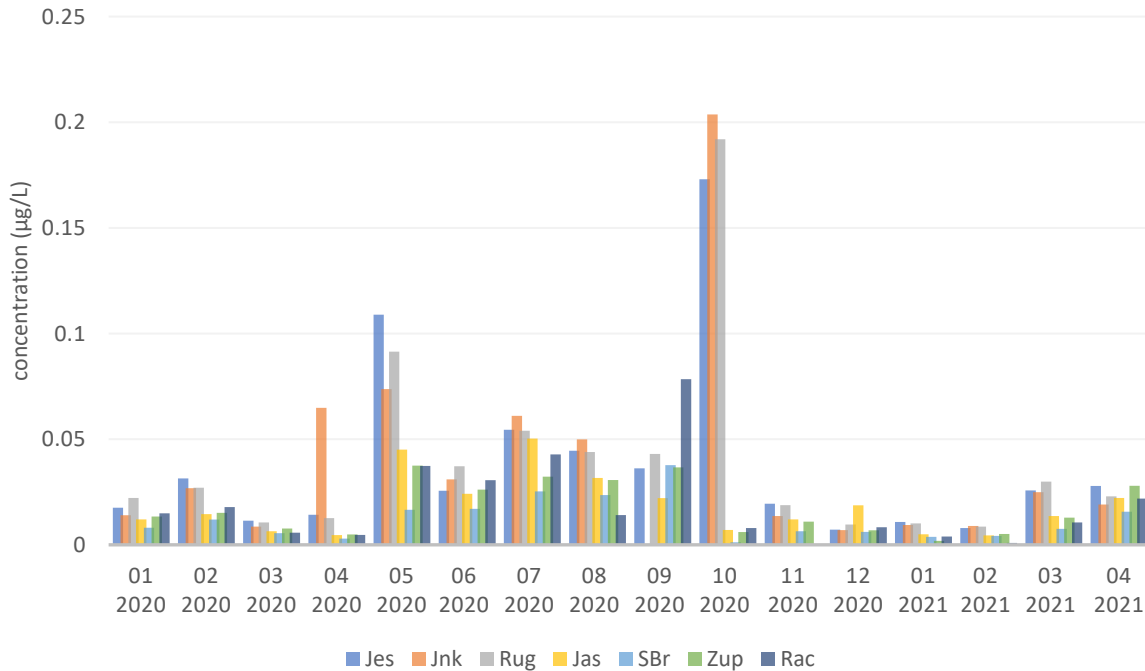



## Amisulpride

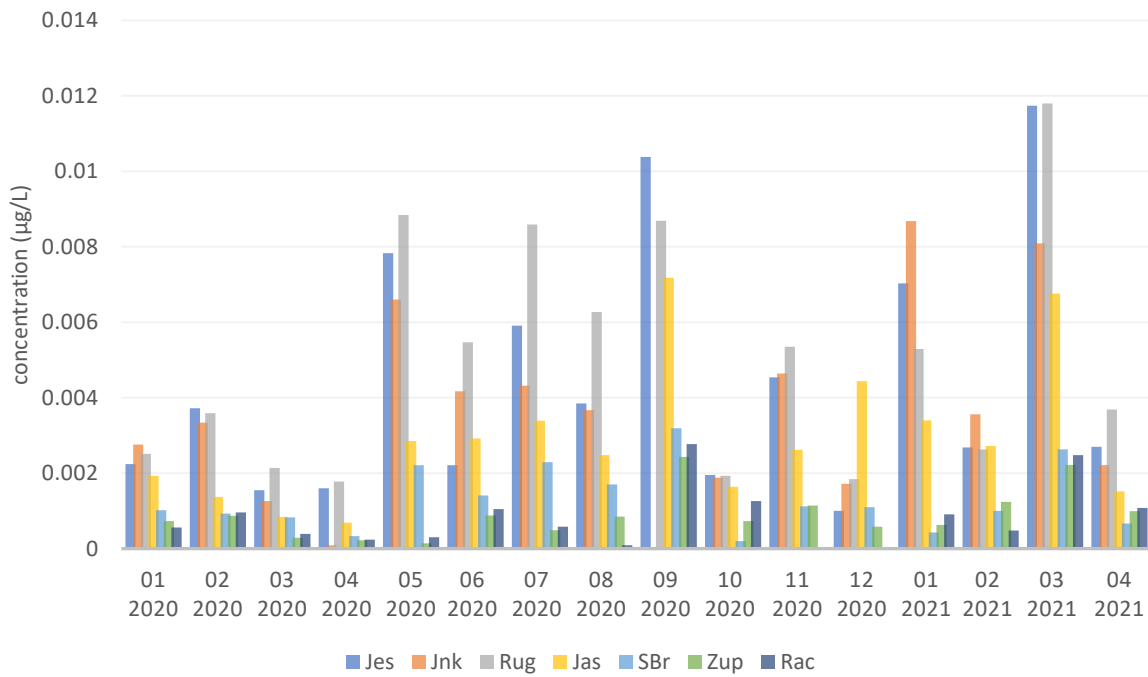

## Cocaine

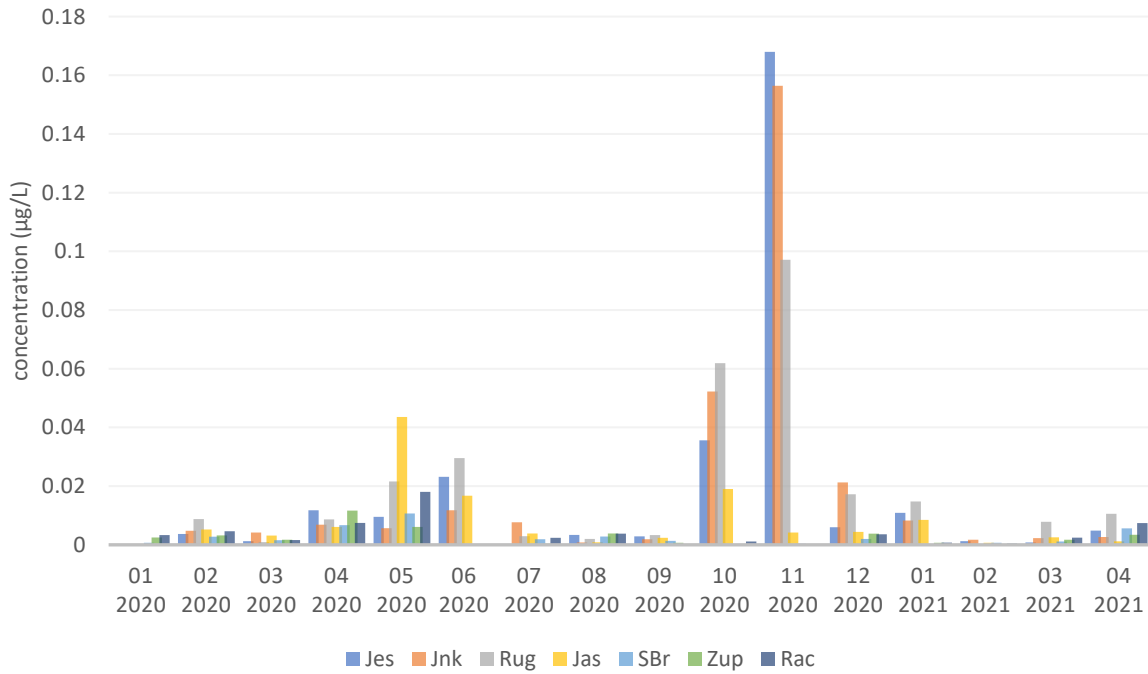



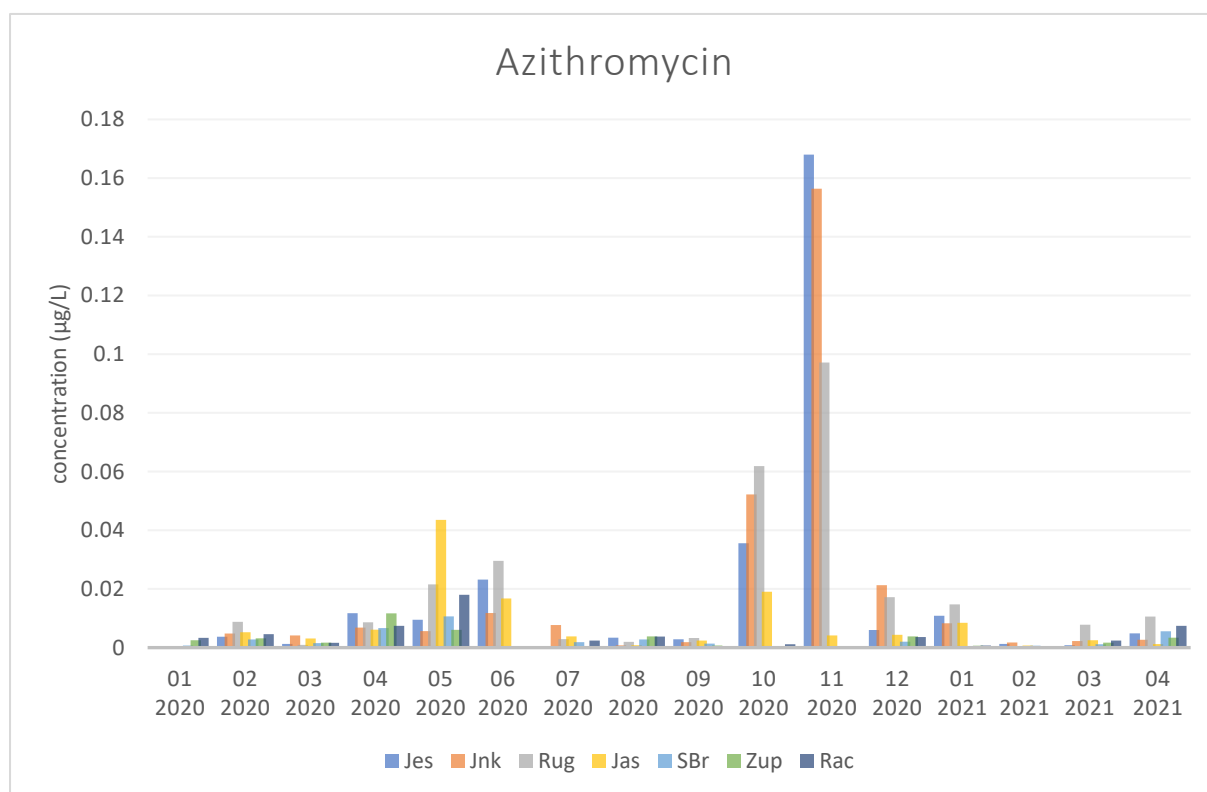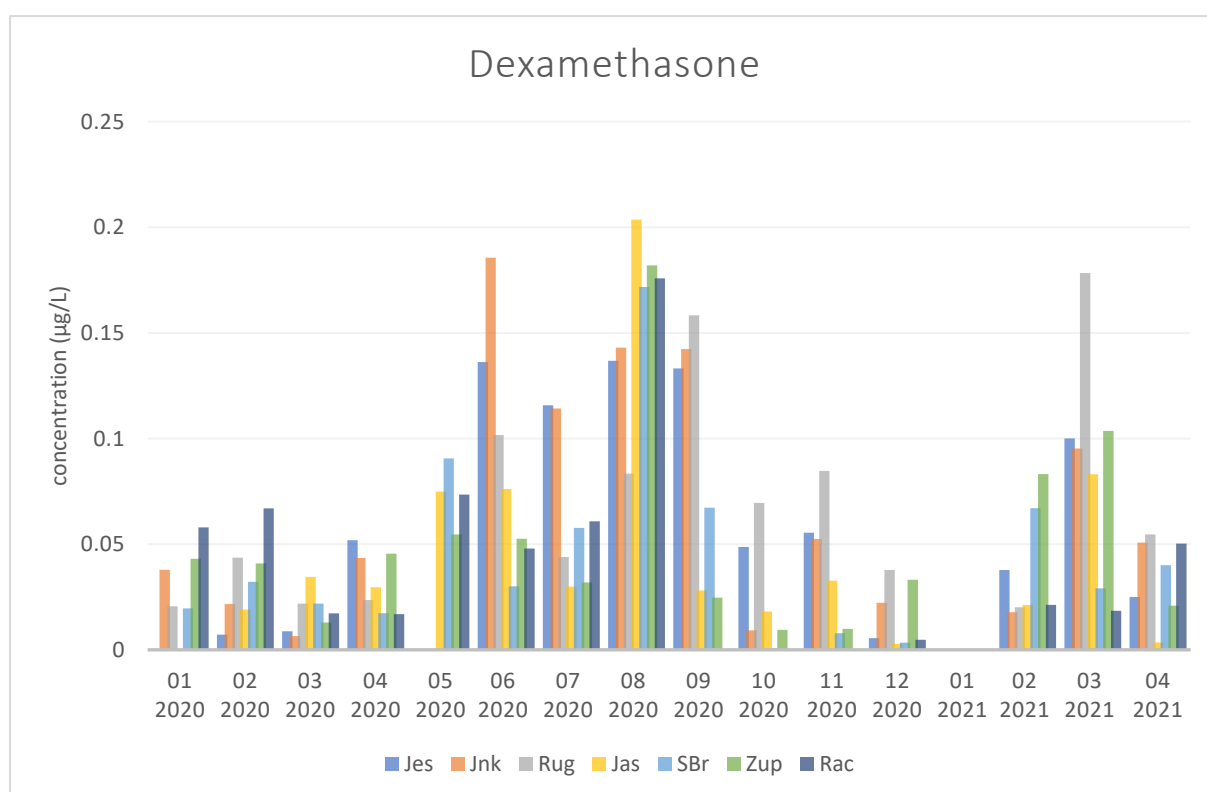

**Figure S1.** PhACs/IDrgs concentrations in Sava River.

## Caffeine

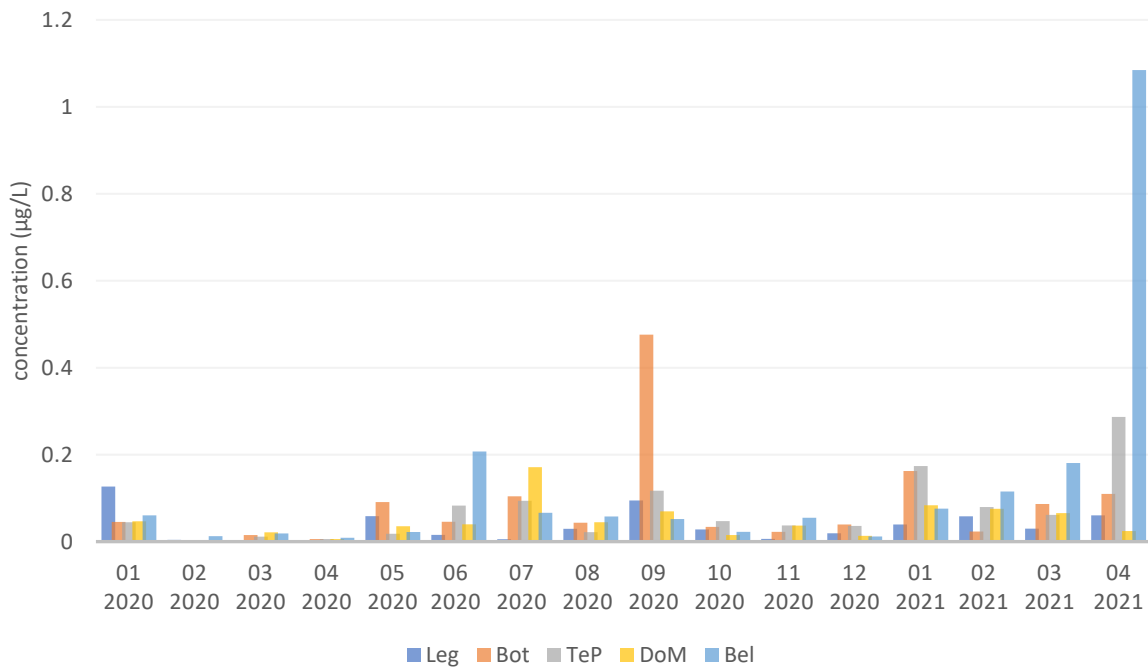

## Cotinine

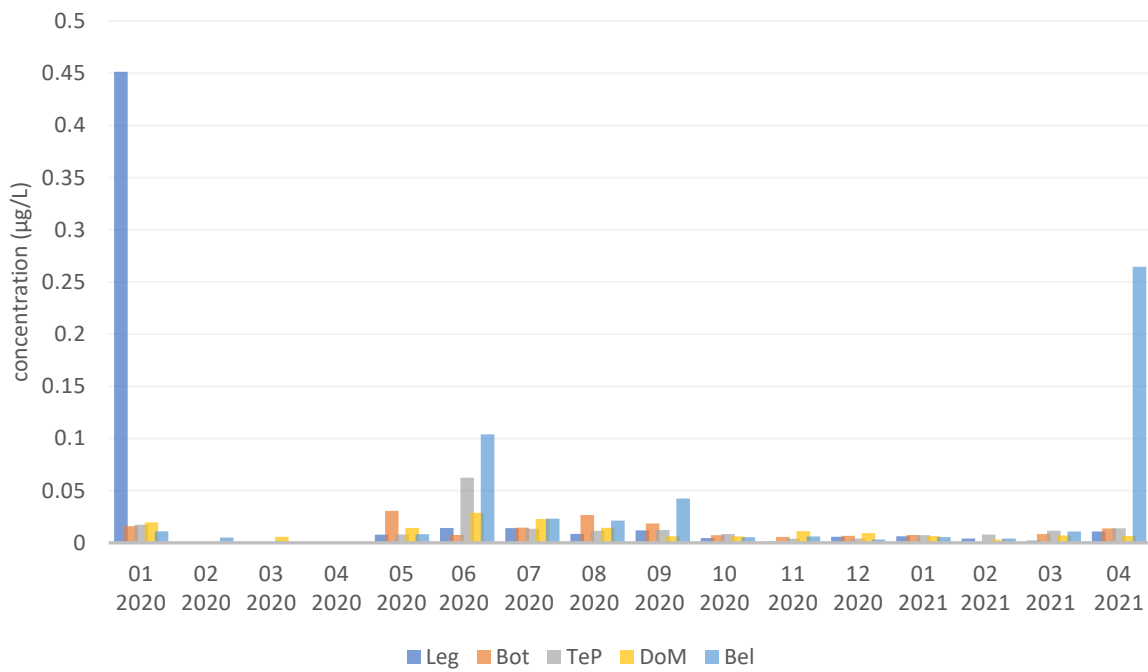

## Carbamazepine

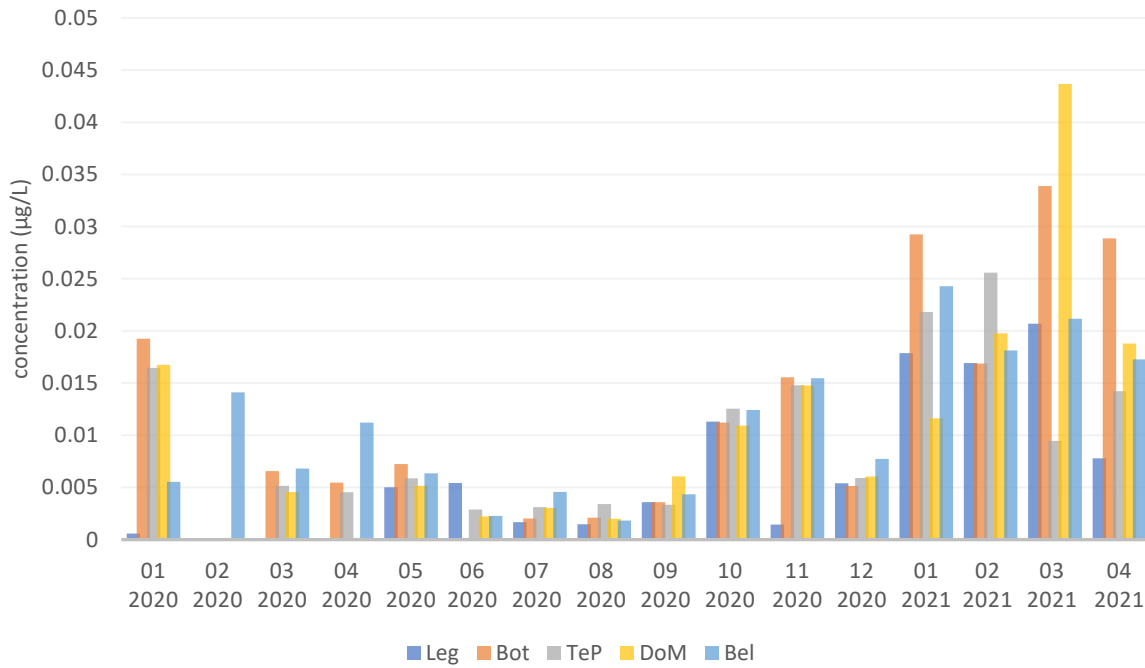

## 10-Hydroxycarbamazepine

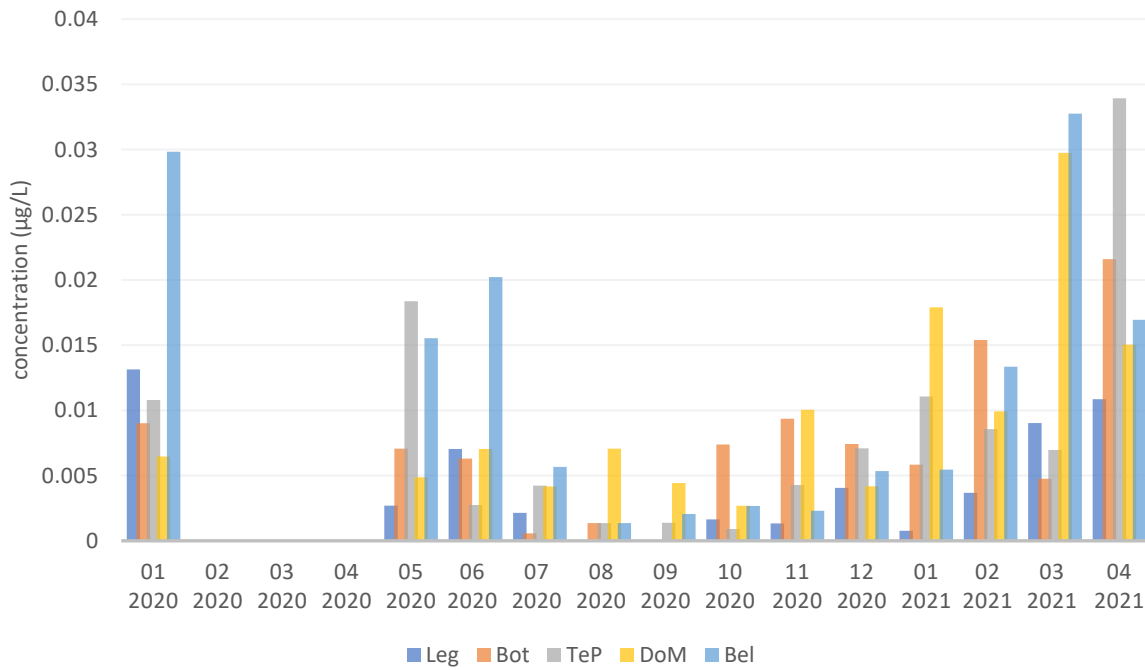

## Lamotrigine

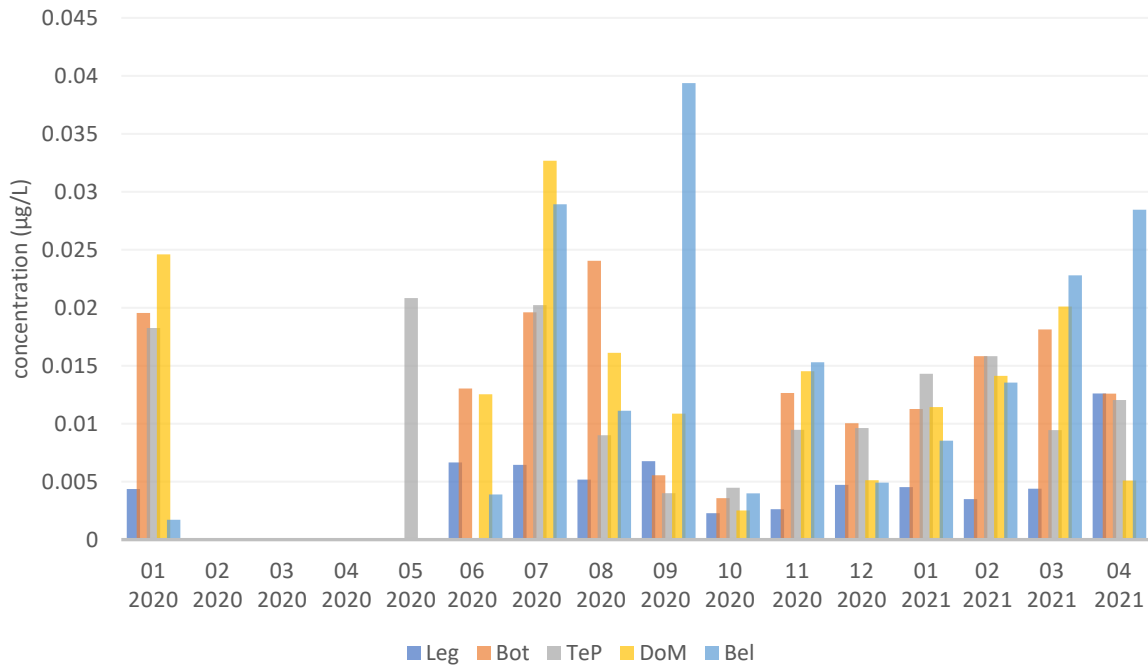

## Venlafaxine

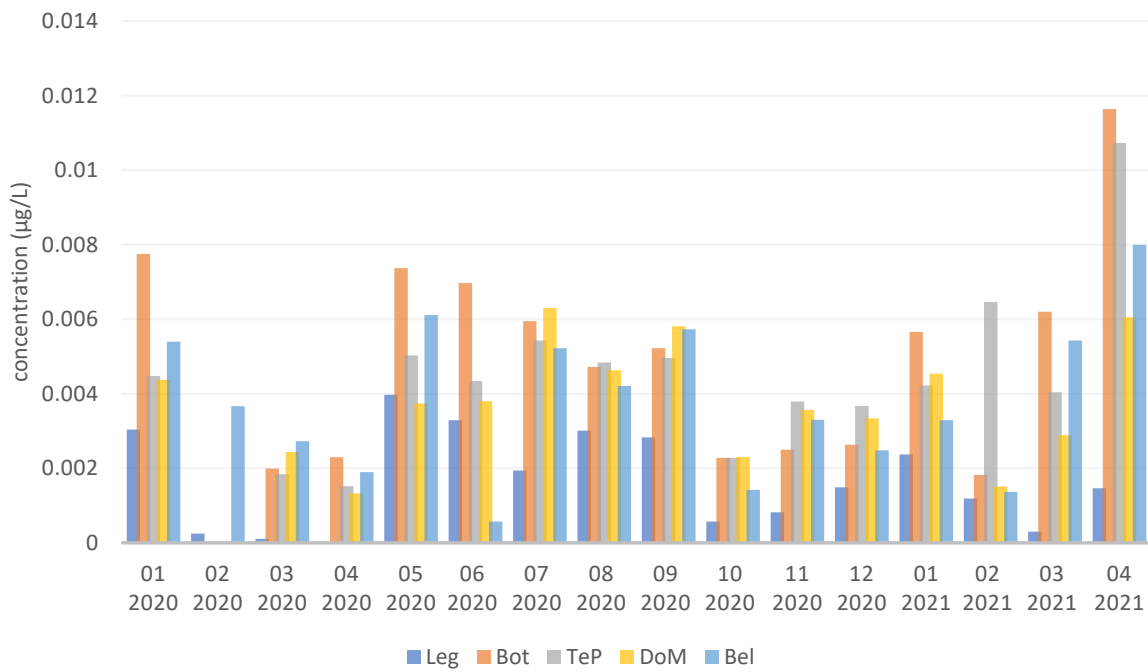

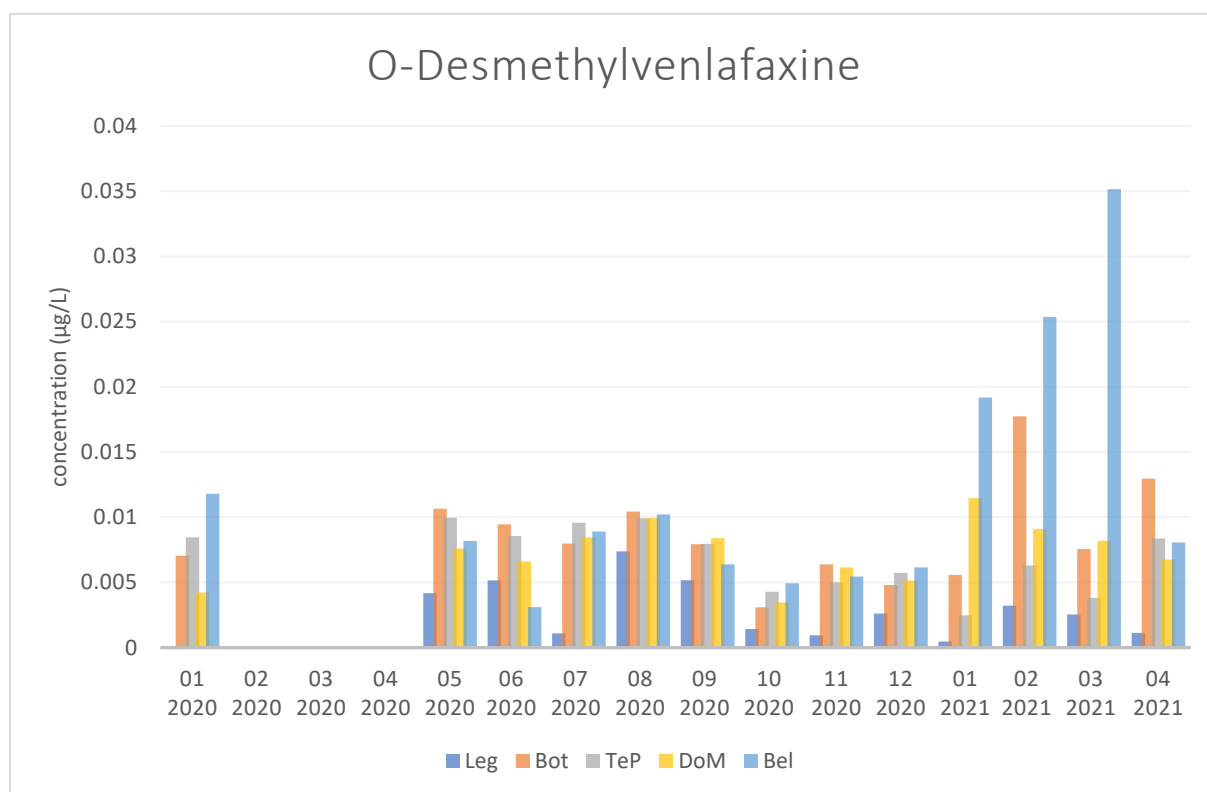

**Figure S2.** PhACs/IDrugs concentrations in Drava River.
